# Supplementary material for: Elevation of Metrnβ and Its Association with Disease Activity in Systemic Lupus Erythematosus
Source: MDPI journal article supplement (doi:10.3390/ijms241713607), 2023-09-02
Supplement: s1 [file s1]

# **Elevation of Metrn $\beta$ and its association with disease activity in Systemic lupus erythematosus**

Chen Zhang <sup>1,2,†</sup>, Shijie Cai <sup>3,†</sup>, Ying Li <sup>1</sup>, Xiaoyan Xu <sup>4</sup>, Yonghui Liu <sup>1</sup>, Huaiyu Qiao <sup>1</sup>, Chun-Kwok Wong <sup>5</sup>, Guoqiu Wu <sup>1,3</sup>, Hui Jin <sup>2,6,\*</sup> and Xun Gao <sup>1,3,\*</sup>

1 Center of Clinical Laboratory Medicine, Zhongda Hospital, Southeast University, Nanjing 210009, Jiangsu, China

2 Department of Epidemiology and Health Statistics, School of Public Health, Southeast University, Nanjing 210009, Jiangsu, China

3 Department of Laboratory Medicine, Medical School of Southeast University, Nanjing 210009, Jiangsu, China

4 Department of Rheumatology, Zhongda Hospital, Southeast University, Nanjing 210009, Jiangsu, China

5 Department of Chemical Pathology, Prince of Wales Hospital, The Chinese University of Hong Kong, Hong Kong, China

6 Key Laboratory of Environmental Medicine Engineering, Ministry of Education, School of Public Health, Southeast University, Nanjing 210009, Jiangsu, China

\* Correspondence: xungao@seu.edu.cn (X.G.); jinhuihld@seu.edu.cn (H.J.)

† These authors contributed equally to the work.

## **Correspondence:**

Dr. Xun Gao

Center of Clinical Laboratory Medicine

Zhongda Hospital

Southeast University

Nanjing, Jiangsu, PR, China

Tel: (86)18094241021; E-Mail: xungao@seu.edu.cn

**Supplementary Table S1** Demographics and clinical parameters of patients with SLE and healthy controls

| Characteristics      | SLE patients<br>(n=52) | Healthy controls<br>(n=53) |
|----------------------|------------------------|----------------------------|
| Sex, female          | 52                     | 53                         |
| Age, years           | 42.08±13.33            | 48.17±14.4                 |
| Anti-dsDNA Ab, IU/mL | 195.5±410.5            | 4.499±4.296                |
| ESR, mm/h            | 32.07±25.69            | 16.91±9.894                |
| CRP, mg/L            | 6.272±10.06            | 0.9277±1.106               |
| C3, g/L              | 0.8412±0.2704          | 0.6035±0.3683              |
| C4, g/L              | 0.1979±0.08935         | 0.1644±0.1492              |
| Urea, mmol/L         | 7.813±8.495            | 5.717±2.074                |
| Creatine, µmol/L     | 93.98±122.0            | 60.15±14.35                |
| LDH, U/L             | 236.3±67.90            | 186±51.59                  |
| IgA, g/L             | 7.365±6.191            | 3.368±2.606                |
| IgG, g/L             | 9.231±6.775            | 7.003±4.997                |
| IgM, g/L             | 0.7418±0.5840          | 0.7308±0.8011              |

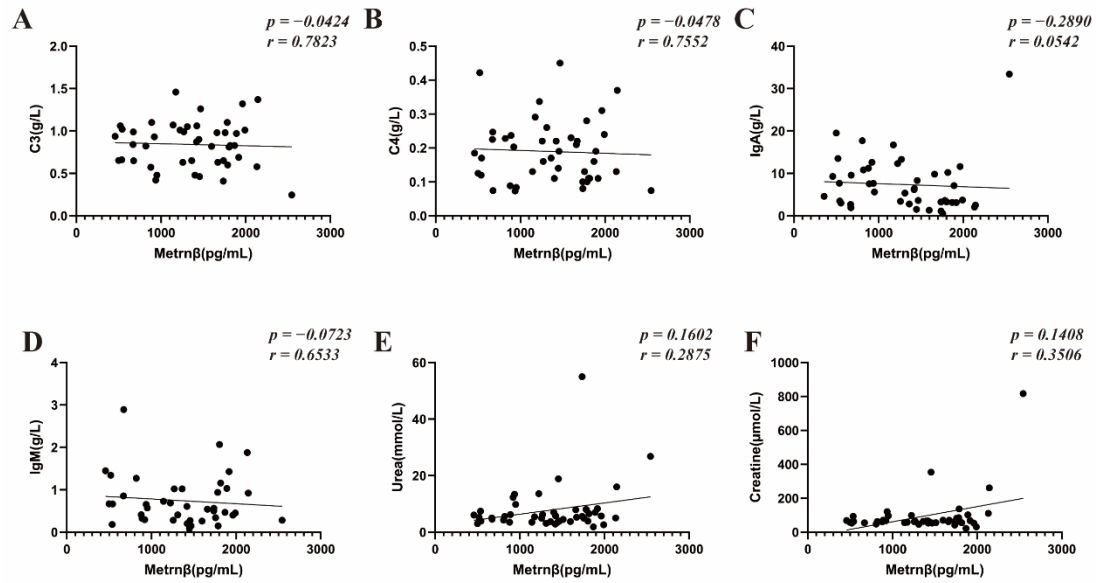

**Figure S1.** Correlation of Metrnβ with clinical parameters in patients with SLE. Serum C3 (n=45), C4 (n=45), IgA (n=45), IgM (n=41), Urea (n=46) and Creatine (n=46) in patients with SLE were routinely tested in the clinical laboratory, and Spearman's correlation coefficient was used for their correlation analysis with serum Metrnβ levels.

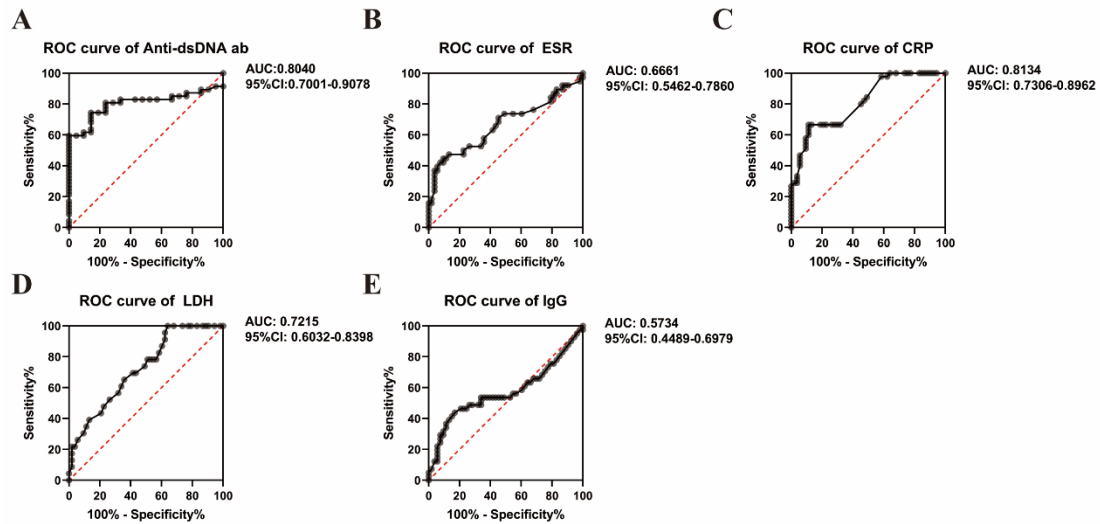

**Figure S2.** Diagnostic value of clinical parameters in SLE. ROC curve was displayed for analyzing the potential of Anti-dsDNA Ab (A), ESR (B), CRP (C), LDH (D) as well as IgG (E) in distinguishing SLE patients from healthy individuals. AUC: Area under the curve; ESR: Erythrocyte Sedimentation Rate; CRP: C-reactive protein; LDH: Lactate dehydrogenase.
